# Supplementary material
Source: publisher figshare collection journal article supplement (https://sage.figshare.com/ndownloader/files/22849502)
Supplement: Supplementary file 1 [file 22849502]

Appendix A

PRISMA Flow Diagram

Records identified through database searching (*n* = 3456)

**# records removed, with reasons (for electronic database):**

Punishment not applied (*n* = 4)

Punishment not analyzed experimentally (*n* = 72)

Intervention not applied to challenging behavior (*n* = 6)

No participant under age 6 with diagnosed disability (*n* = 4)

Study did not occur in natural setting (*n* = 21)

Records after duplicates removed
(*n* = 2941)

**# records removed, with reasons (for electronic database):**

Punishment not applied (*n* = 4)

Punishment not analyzed experimentally (*n* = 15)

Punishment not applied to challenging behavior (*n* = 1)

No participant under age 6 with diagnosed disability (*n* = 4)

Study did not occur in natural setting (*n* = 0)

Additional full-text articles assessed for eligibility (*n* = 27)

Additional articles meeting inclusion criteria (*n* = 3)

Articles included in synthesis (*n* = 22)

Articles meeting inclusion criteria identified in database search (*n* = 19)

Full-text articles assessed for eligibility (*n* = 126)

Records screened
(*n* = 2941)
